# Supplementary material for: Antimicrobial Prescribing in Dogs and Cats in Australia: Results of the Australasian Infectious Disease Advisory Panel Survey
Source: PubMed Central journal article supplement — J Vet Intern Med. 2017 May 17;31(4):1100–7. doi: 10.1111/jvim.14733 (PMC5508328; doi:10.1111/jvim.14733), 2017-05-17
Supplement: JVIM-31-1100-s001.pdf [file JVIM-31-1100-s001.pdf]

## Section A

In this section you are asked to nominate your most common (>50% of the time) approach to patients with conditions in which clinical evidence suggests the indicated diagnosis. You may perform all of the procedures at some time, but the aim is to determine your most common approach in the majority of your patients.

### 1.1 Abscess/cellulitis in cats

- a. Empiric antibiotic treatment (select drug from list provided)
  - i. For how long, on average, would you prescribe this antibiotic?
- b. Antibiotic treatment depending on culture and susceptibility testing (CST)
  - i. If the results suggest a bacterial cause, for how long on average would you prescribe an antibiotic?
- c. Surgical drainage/debridement; no antibiotics used
- d. Surgical drainage/debridement plus antibiotics used (Select drug from list provided)
- e. Other treatment (please specify)

### 1.2 Abscess/cellulitis in dogs

- a. Empiric antibiotic treatment (select drug from list provided)
  - i. For how long, on average, would you prescribe this antibiotic?
- b. Antibiotic treatment depending on culture and susceptibility testing (CST)
  - i. If the results suggest a bacterial cause, for how long on average would you prescribe an antibiotic?
- c. Surgical drainage/debridement; no antibiotics used
- d. Surgical drainage/debridement plus antibiotics used (Select drug from list provided)
- e. Other treatment (please specify)

### 2.1 Chronic gingivostomatitis/faucitis in cats

- a. Empiric antibiotic treatment (select drug from list provided)
  - i. For how long, on average, would you prescribe this antibiotic?
- b. Antibiotic treatment depending on culture and susceptibility testing (CST)
  - i. If the results suggest a bacterial cause, for how long on average would you prescribe an antibiotic?
- c. Treat periodontal disease as appropriate (e.g. scaling, extractions etc)
- d. Other immunomodulatory drug treatment (e.g. omega-interferon, corticosteroids, cyclosporine, chlorambucil)
- e. Other (specify e.g. change of diet, lactoferrin, thalidomide)

### 2.2 Chronic gingivostomatitis/faucitis in dogs

- a. Empiric antibiotic treatment (select drug from list provided)
  - i. For how long, on average, would you prescribe this antibiotic?
- b. Antibiotic treatment depending on culture and susceptibility testing (CST)
  - i. If the results suggest a bacterial cause, for how long on average would you prescribe an antibiotic?
- c. Treat periodontal disease as appropriate (e.g. scaling, extractions etc)

- d. Other immunomodulatory drug treatment (e.g. omega-interferon, corticosteroids, cyclosporine, chlorambucil)
- e. Other (specify e.g. change of diet, lactoferrin, thalidomide)

3.1 Acute upper respiratory infection in cats

- a. Empiric antibiotic treatment (select drug from list provided)
  - I. For how long, on average, would you prescribe this antibiotic?
- b. Antibiotic treatment based on CST of nasal discharge or nasal washings
  - I. For how long, on average, would you prescribe this antibiotic?
- c. Other treatments (please specify)

3.2 Acute upper respiratory infection in dogs

- a. Empiric antibiotic treatment (select drug from list provided)
  - I. For how long, on average, would you prescribe this antibiotic?
- b. Antibiotic treatment based on CST of nasal discharge or nasal washings
  - I. For how long, on average, would you prescribe this antibiotic?
- c. Other treatments (please specify)

4.1 Chronic rhinosinusitis ("Chronic nasal disease") in cats

- a. Empiric antibiotic treatment (select drug from list provided)
  - I. For how long, on average, would you prescribe this antibiotic?
- b. Antibiotic treatment based on CST of nasal discharge or nasal washings
  - I. For how long, on average, would you prescribe this antibiotic?
- c. Antibiotic treatment based on CST of nasal mucosal biopsies
- d. Other immunomodulatory drug treatment (please specify)
- e. Other treatments (please specify)

4.2 Chronic rhinosinusitis ("Chronic nasal disease") in dogs

- a. Empiric antibiotic treatment (select drug from list provided)
  - I. For how long, on average, would you prescribe this antibiotic?
- b. Antibiotic treatment based on CST of nasal discharge or nasal washings
  - I. For how long, on average, would you prescribe this antibiotic?
- c. Antibiotic treatment based on CST of nasal mucosal biopsies
- d. Other immunomodulatory drug treatment (please specify)
- e. Other treatments (please specify)

5.1 Acute lower respiratory tract infection (crackles on auscultation of thorax, febrile) in cats

- a. Empiric antibiotic treatment (select drug from list provided)
  - I. For how long, on average, would you prescribe this antibiotic?
- b. Antibiotic treatment based on CST of bronchoalveolar lavage or fine needle aspirate biopsies or trans-tracheal washings
  - I. For how long, on average, would you prescribe this antibiotic?
- c. Other treatments (please specify)

5.2 Acute lower respiratory tract infection (crackles on auscultation of thorax, febrile) in dogs

- a. Empiric antibiotic treatment (select drug from list provided)
  - I. For how long, on average, would you prescribe this antibiotic?
- b. Antibiotic treatment based on CST of bronchoalveolar lavage or fine needle aspirate biopsies or trans-tracheal washings
  - I. For how long, on average, would you prescribe this antibiotic?
- c. Other treatments (please specify)

#### 6.1 Pyothorax in cats

- a. Empiric antibiotic treatment (select drug from list provided)
  - I. For how long, on average, would you prescribe this antibiotic?
- b. Antibiotic treatment depending on culture and susceptibility testing (CST)
  - I. If the results suggest a bacterial cause, for how long on average would you prescribe an antibiotic?
- c. Drainage of pleural effusion by daily thoracocentesis
- d. Drainage of pleural effusion by indwelling thoracostomy (chest) tubes
- e. Local instillation of antibiotic or antiseptic (please specify)
- f. Other treatments (please specify)

#### 6.2 Pyothorax in dogs

- a. Empiric antibiotic treatment (select drug from list provided)
  - I. For how long, on average, would you prescribe this antibiotic?
- b. Antibiotic treatment depending on culture and susceptibility testing (CST)
  - I. If the results suggest a bacterial cause, for how long on average would you prescribe an antibiotic?
- c. Drainage of pleural effusion by daily thoracocentesis
- d. Drainage of pleural effusion by indwelling thoracostomy (chest) tubes
- e. Local instillation of antibiotic or antiseptic (please specify)
- f. Other treatments (please specify)

#### 7.1 Acute lower urinary tract disorder/cystitis (first occurrence) in cats

- a. Empiric antibiotic treatment (select drug from list provided)
  - I. For how long, on average, would you prescribe this antibiotic?
- b. Antibiotic treatment depending on culture and susceptibility testing (CST)
  - I. If the results suggest a bacterial cause, for how long on average would you prescribe an antibiotic?
- c. Other immunomodulatory/anti-inflammatory drug treatment (please specify, e.g. corticosteroids, meloxicam, chlorambucil, cyclosporine, pentosan polysulfate, glucosamines)
- d. Other treatments (please specify)

#### 7.2 Acute lower urinary tract disorder/cystitis (first occurrence) in dogs

- a. Empiric antibiotic treatment (select drug from list provided)
  - I. For how long, on average, would you prescribe this antibiotic?
- b. Antibiotic treatment depending on culture and susceptibility testing (CST)
  - I. If the results suggest a bacterial cause, for how long on average would you prescribe an antibiotic?

- c. Other immunomodulatory/anti-inflammatory drug treatment (please specify, e.g. corticosteroids, meloxicam, chlorambucil, cyclosporine, pentosan polysulfate, glucosamines)
- d. Other treatments (please specify)

8.1 Recurrent lower urinary tract disorder/cystitis in cats

- a. Empiric antibiotic treatment (select drug from list provided)
  - i. For how long, on average, would you prescribe this antibiotic?
- b. Antibiotic treatment depending on culture and susceptibility testing (CST)
  - i. If the results suggest a bacterial cause, for how long on average would you prescribe an antibiotic?
- c. Other immunomodulatory/anti-inflammatory drug treatment (please specify)
- d. Other treatments (please specify)

8.2 Recurrent lower urinary tract disorder/cystitis in dogs

- a. Empiric antibiotic treatment (select drug from list provided)
  - i. For how long, on average, would you prescribe this antibiotic?
- b. Antibiotic treatment depending on culture and susceptibility testing (CST)
  - i. If the results suggest a bacterial cause, for how long on average would you prescribe an antibiotic?
- c. Other immunomodulatory/anti-inflammatory drug treatment (please specify)
- d. Other treatments (please specify)

9.1 Chronic kidney disease/chronic kidney failure (increased urea/creatinine and USG < 1.035) with pyuria in cats

- a. Empiric antibiotic treatment (select drug from list provided)
  - i. For how long, on average, would you prescribe this antibiotic?
- b. Antibiotic treatment depending on culture and susceptibility testing (CST)
  - i. If the results suggest a bacterial cause, for how long on average would you prescribe an antibiotic?
- c. Other immunomodulatory/anti-inflammatory drug treatment (please specify)
- d. Other treatments (please specify)

9.2 Chronic kidney disease/chronic kidney failure (increased urea/creatinine and USG < 1.035) with pyuria in dogs

- a. Empiric antibiotic treatment (select drug from list provided)
  - i. For how long, on average, would you prescribe this antibiotic?
- b. Antibiotic treatment depending on culture and susceptibility testing (CST)
  - i. If the results suggest a bacterial cause, for how long on average would you prescribe an antibiotic?
- c. Other immunomodulatory/anti-inflammatory drug treatment (please specify)
- d. Other treatments (please specify)

10.1 Acute febrile illness (inappetant, pyrexia (>39.5 degrees C), lethargic, but no localising signs in cats)

- a. Empiric antibiotic treatment (select drug from list provided)
  - i. For how long, on average, would you prescribe this antibiotic?

- b. Other immunomodulatory/anti-inflammatory drug treatment (please specify)
  - c. Treatment only following investigations
  - d. Other treatments (please specify, including other antibiotics specified from the drug list in part a)
- 10.2 Acute febrile illness (inappetant, pyrexia (>39.5 degrees C), lethargic, but no localising signs in dogs)
- a. Empiric antibiotic treatment (select drug from list provided)
    - i. For how long, on average, would you prescribe this antibiotic?
  - b. Other immunomodulatory/anti-inflammatory drug treatment (please specify)
  - c. Treatment only following investigations
  - d. Other treatments (please specify, including other antibiotics specified from the drug list in part a)
- 11.1 A cat with acute severe abdominal pain (acute abdomen), temperature 40.1°C, leukopenia, neutropenia and a left shift. Abdominocentesis show a purulent fluid with neutrophils and intracellular bacteria.
- a. Empiric antibiotic treatment (select drug from list provided)
    - i. For how long, on average, would you prescribe this antibiotic?
  - b. Treatment based upon urine culture and sensitivity
    - i. For how long, on average, would you prescribe this antibiotic?
  - c. Other immunomodulatory/anti-inflammatory drug treatment (please specify)
  - d. Treatment only following investigations
  - e. Other treatments (please specify, including other antibiotics specified from the drug list in part a)
- 11.2 A dog with acute severe abdominal pain (acute abdomen), temperature 40.1°C, leukopenia, neutropenia and a left shift. Abdominocentesis show a purulent fluid with neutrophils and intracellular bacteria.
- a. Empiric antibiotic treatment (select drug from list provided)
    - i. For how long, on average, would you prescribe this antibiotic?
  - b. Treatment based upon urine culture and sensitivity
    - i. For how long, on average, would you prescribe this antibiotic?
  - c. Other immunomodulatory/anti-inflammatory drug treatment (please specify)
  - d. Treatment only following investigations
  - e. Other treatments (please specify, including other antibiotics specified from the drug list in part a)
- 12.1 6 month old cat following routine desexing
- a. Empiric antibiotic treatment (select drug from list provided)
    - i. For how long, on average, would you prescribe this antibiotic?
  - b. No antibiotic used
  - c. Anti-inflammatory/analgesic drug treatment
  - d. Other treatments (please specify)
- 12.2 6 month old dog following routine desexing
- a. Empiric antibiotic treatment (select drug from list provided)

- I. For how long, on average, would you prescribe this antibiotic?
  - b. No antibiotic used
  - c. Anti-inflammatory/analgesic drug treatment
  - d. Other treatments (please specify)
  
- 13.1 7 year old cat undergoing dental scaling with several teeth extractions
  - a. Empiric antibiotic treatment (select drug from list provided)
    - I. For how long, on average, would you prescribe this antibiotic?
    - II. Do you prescribe this antibiotic prophylactically?
    - III. Before or after dental treatment?
  - b. Culture of the affected tissues with antibiotics prescribed based on sensitivity testing
    - I. For how long, on average, would you prescribe this antibiotic?
  - c. No antibiotic prescribed
  - d. Other immunomodulatory/anti-inflammatory drug treatment
  - e. Other treatments (please specify)
  
- 13.2 7 year old dog undergoing dental scaling with several teeth extractions
  - a. Empiric antibiotic treatment (select drug from list provided)
    - I. For how long, on average, would you prescribe this antibiotic?
    - II. Do you prescribe this antibiotic prophylactically?
    - III. Before or after dental treatment?
  - b. Culture of the affected tissues with antibiotics prescribed based on sensitivity testing
    - I. For how long, on average, would you prescribe this antibiotic?
  - c. No antibiotic prescribed
  - d. Other immunomodulatory/anti-inflammatory drug treatment
  - e. Other treatments (please specify)

## SECTION B - DERMATOLOGY

In this section you are asked to outline your most common (>50% of the time) approach to patients with conditions in which clinical evidence suggests the indicated diagnosis. You may perform all of the procedures at some time, but the aim is to determine your most common approach in the majority of your patients.

1. For surface bacterial infections: (i.e. pyotraumatic, intertrigo e.g. lip fold, tail fold) would you use:
  - a. Topical medication only (select drug from list provided)
  - b. Systemic medication only (select drug from list provided)
  - c. Topical and systemic medications (select drugs from lists provided)
  - d. If you prescribe any other medications (including those from the lists above that you have not selected) please specify
  - e. How long would you use the systemic medication for (in days)?
  
2. For superficial bacterial infections: (i.e. mucocutaneous pyoderma, bacterial folliculitis, bacterial overgrowth) would you use:

- a. Topical medication only (select drug from list provided)
  - b. Systemic medication only (select drug from list provided)
  - c. Topical and systemic medications (select drugs from lists provided)
  - d. If you prescribe any other medications (including those from the lists above that you have not selected) please specify
  - e. How long would you use the systemic medication for (in days)?
3. For deep bacterial infections: (i.e. furunculosis with draining tracts) would you use:
  - a. Topical medication only (select drug from list provided)
  - b. Systemic medication only (select drug from list provided)
  - c. Topical and systemic medications (select drugs from lists provided)
  - d. If you prescribe any other medications (including those from the lists above that you have not selected) please specify
  - e. How long would you use the systemic medication for (in days)?
4. For bacterial infections involving mycobacteria (deep draining tracts) would you use:
  - a. Topical medication only (select drug from list provided)
  - b. Systemic medication only (select drug from list provided)
  - c. Topical and systemic medications (select drugs from lists provided)
  - d. If you prescribe any other medications (including those from the lists above that you have not selected) please specify
  - e. How long would you use the systemic medication for (in days)?
5. For dermatophyte infections (e.g. Microsporum or Trichophyton) would you use:
  - a. Topical medication only (select drug from list provided)
  - b. Systemic medication only (select drug from list provided)
  - c. Topical and systemic medications (select drugs from lists provided)
  - d. If you prescribe any other medications (including those from the lists above that you have not selected) please specify
  - e. How long would you use the systemic medication for (in days)?
6. For superficial yeast (*Malassezia*) infections of the skin (not including ears) would you use:
  - a. Topical medication only (select drug from list provided)
  - b. Systemic medication only (select drug from list provided)
  - c. Topical and systemic medications (select drugs from lists provided)
  - d. If you prescribe any other medications (including those from the lists above that you have not selected) please specify
  - e. How long would you use the systemic medication for (in days)?
7. For uncomplicated (first episode) otitis externa would you use:
  - a. Topical medication only (select drug from list provided)
  - b. Systemic medication only (select drug from list provided)
  - c. Topical and systemic medications (select drugs from lists provided)
  - d. If you prescribe any other medications (including those from the lists above that you have not selected) please specify
  - e. How long would you use the systemic medication for (in days)?

8. For complicated (recurrent) otitis externa would you use:
  - a. Topical medication only (select drug from list provided)
  - b. Systemic medication only (select drug from list provided)
  - c. Topical and systemic medications (select drugs from lists provided)
  - d. If you prescribe any other medications (including those from the lists above that you have not selected) please specify
  - e. How long would you use the systemic medication for (in days)?
